# Supplementary material for: The Neuroprotective Effect of GPR4 Inhibition through Attenuation of Caspase Mediated Apoptotic Cell Death in MPTP Induced Mouse Model of Parkinson’s Disease
Source: Preprints.org preprint supplement (doi:10.20944/preprints202104.0223.v1), 2021-04-08
Supplement: Supplementary file 1 [file supplementary]

## pH condition changes the expression level of GPR4 and the expression of apoptotic markers

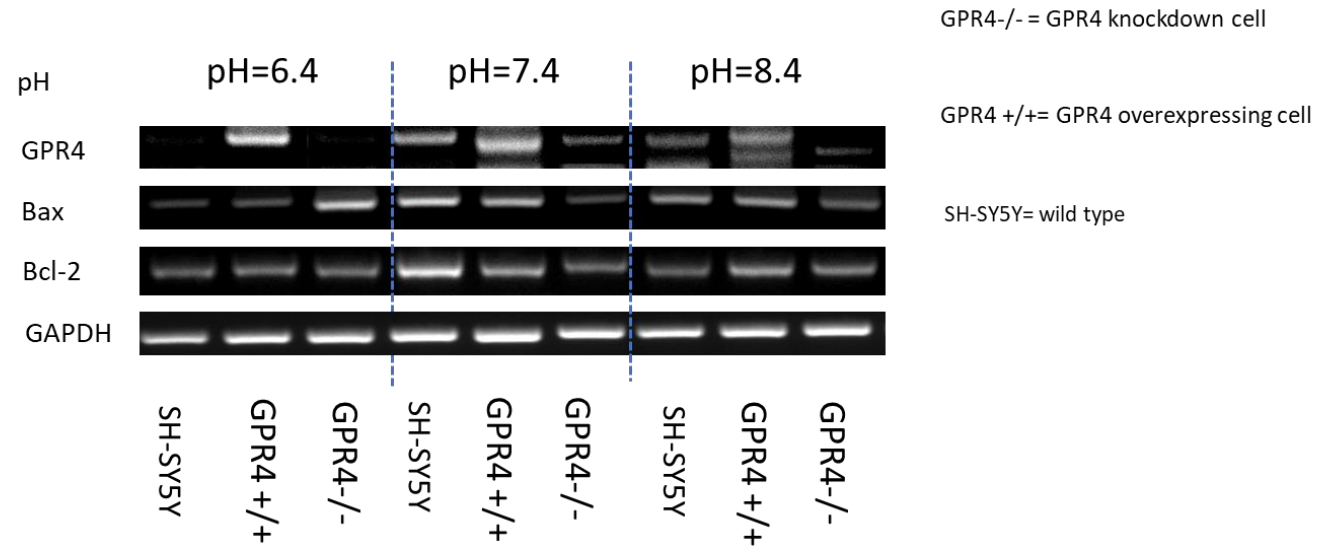

**Supplementary figure 2:** pH condition changes the expression level of GPR4 and the expression of apoptotic markers. mRNA expression level of GPR4 and Bax, Bcl-2 apoptotic markers in the SH-SY5Y. SH-SY5Y stably expressing GPR4 and GPR4 knocked out stable SH-SY5Y cells treated with different pH mediums for 6 hours. GAPDH was used as internal control.
